# Supplementary material for: Unconventional vapor–liquid–solid mechanism of ultra-long Ba6Mn24O48 whiskers growth from chloride fluxes
Source: Royal Society of Chemistry journal article supplement (doi:10.1039/c2ce00028h), 2012-01-01
Supplement: c2ce00028h.pdf [file c2ce00028h.pdf]

## Unconventional vapor – liquid – solid mechanism of ultralong $\text{Ba}_6\text{Mn}_{24}\text{O}_{48}$ whiskers growth from chloride fluxes

E.A.Pomerantseva<sup>a</sup>, E.A.Goodilin<sup>a,b,\*</sup>, Yu.D.Tretyakov<sup>a,b</sup>

<sup>a</sup> - Department of Materials Science, Moscow State University, Lenin Hills, Moscow 119991, Russia

<sup>b</sup> – Department of Chemistry, Moscow State University, Lenin Hills, Moscow, 119991, Russia

\* Corresponding author. E-mail: [goodilin@inorg.chem.msu.ru](mailto:goodilin@inorg.chem.msu.ru); Tel. +7 495 9394729.

### Supporting information

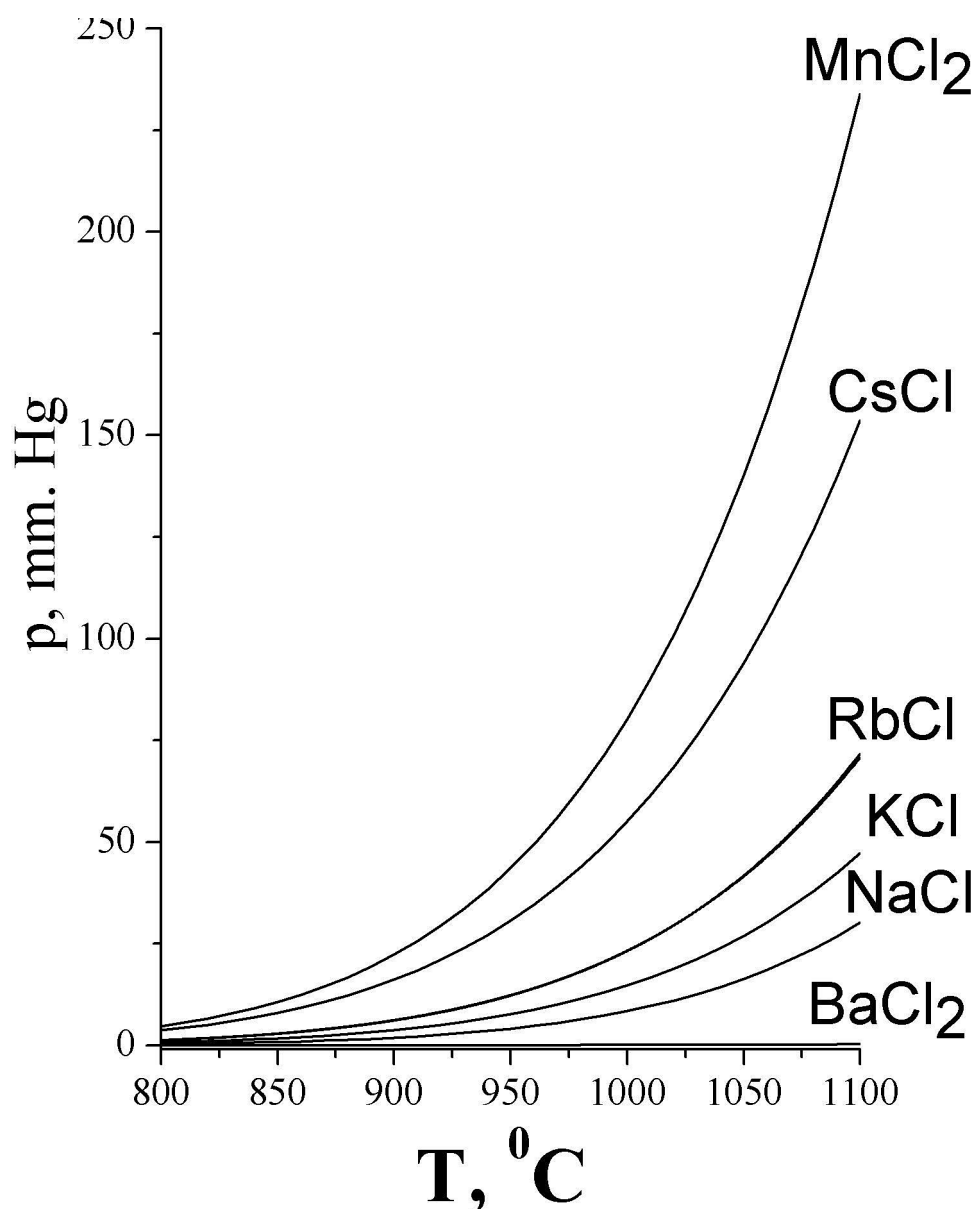

Fig.S1. Calculated data for equilibrium vapor pressure of different chlorides

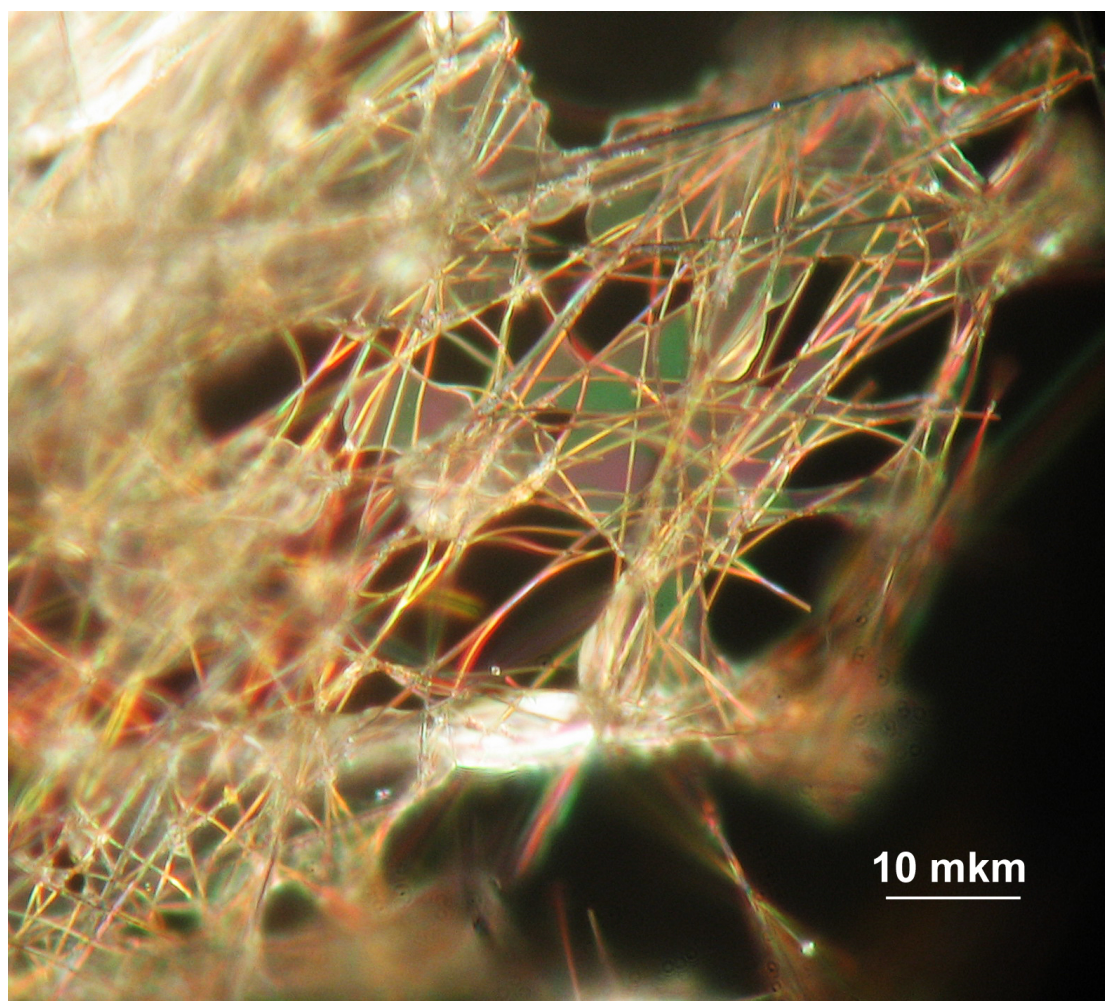

Fig.S2. An optical microscopy view of manganese oxide whiskers with residual KCl flux.

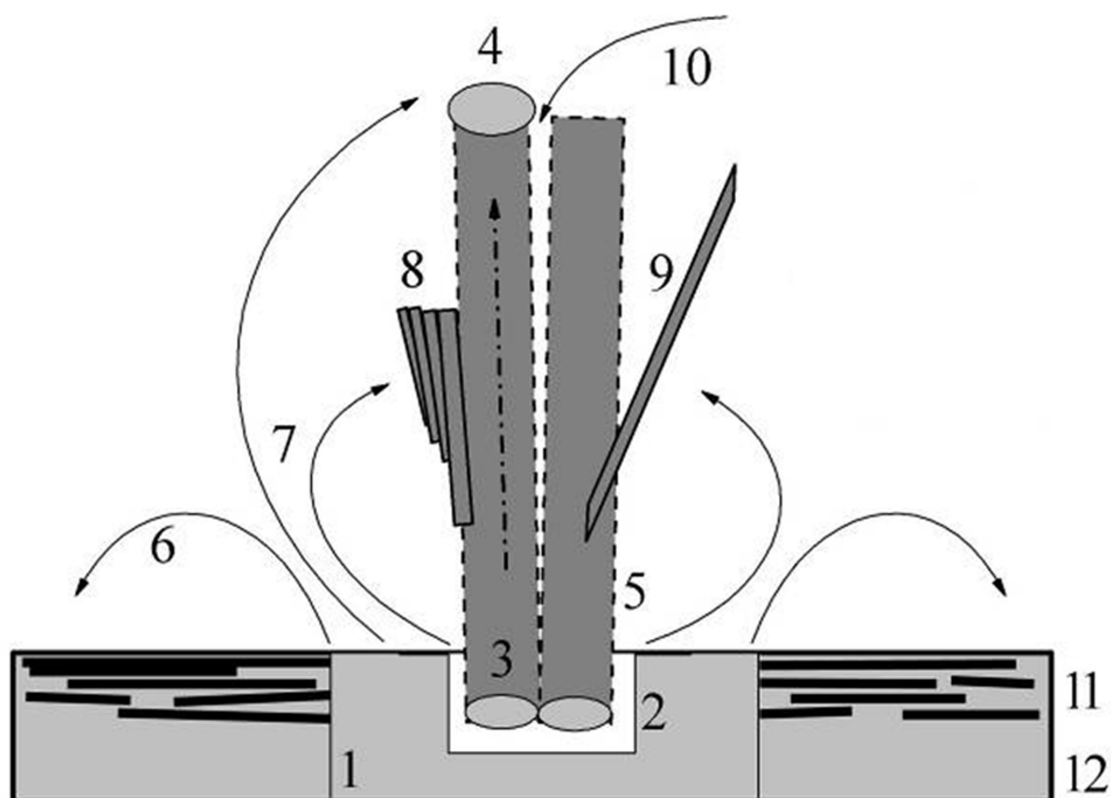

Fig.S3. A scheme of  $\text{Ba}_6\text{Mn}_{24}\text{O}_{48}$  whiskers growth: 1 – reaction zone ( $\text{BaMnO}_3$  pellet contacting with  $\text{KCl}$ ); 2 – eutectic melt containing  $\text{BaCl}_2$ ; 3 – a contact spot between a whisker growing up and a melt, several whiskers constituting pseudomonocrystal can form here; 4 – Ba-enriched melt on top of the growing whisker; 5 – a discontinuous film of  $\text{BaCl}_2$  melt covering whisker surface and ensuring interaction with the gas phase components; 6 – enrichment of the gas phase with  $\text{MnCl}_2$  and transportation of the chloride to the melt surface; 7 –  $\text{MnCl}_2$  oxidation in air resulting in manganese oxides formation depositing on whiskers surface and interacting with  $\text{BaCl}_2$  film; 8 – formation of side whiskers; 9 – growth of whiskers branches forming on creeping  $\text{BaCl}_2$  droplets formed due to the  $\text{BaCl}_2$  melt film rapture; 10 – preferable manganese oxide deposition between two growing whiskers, connecting them in one pseudo single crystal; 11 – oriented growth of the floating whiskers on the melt surface contacting with the air oxygen; 12 – inner area of the melt where whiskers growth is suppressed due to the lack of gas oxidizing agents.
